# Supplementary material for: Pulmonary Toxicity of Polymethyl methacrylate nanoplastics via Intratracheal Intubation in Mice
Source: Research Square preprint supplement (doi:10.21203/rs.3.rs-7466865/v1), 2025-09-11
Supplement: Supplementary file 1 [file 57ed1636b4c1fc8cdc77e485.pdf]

Supplement 2.

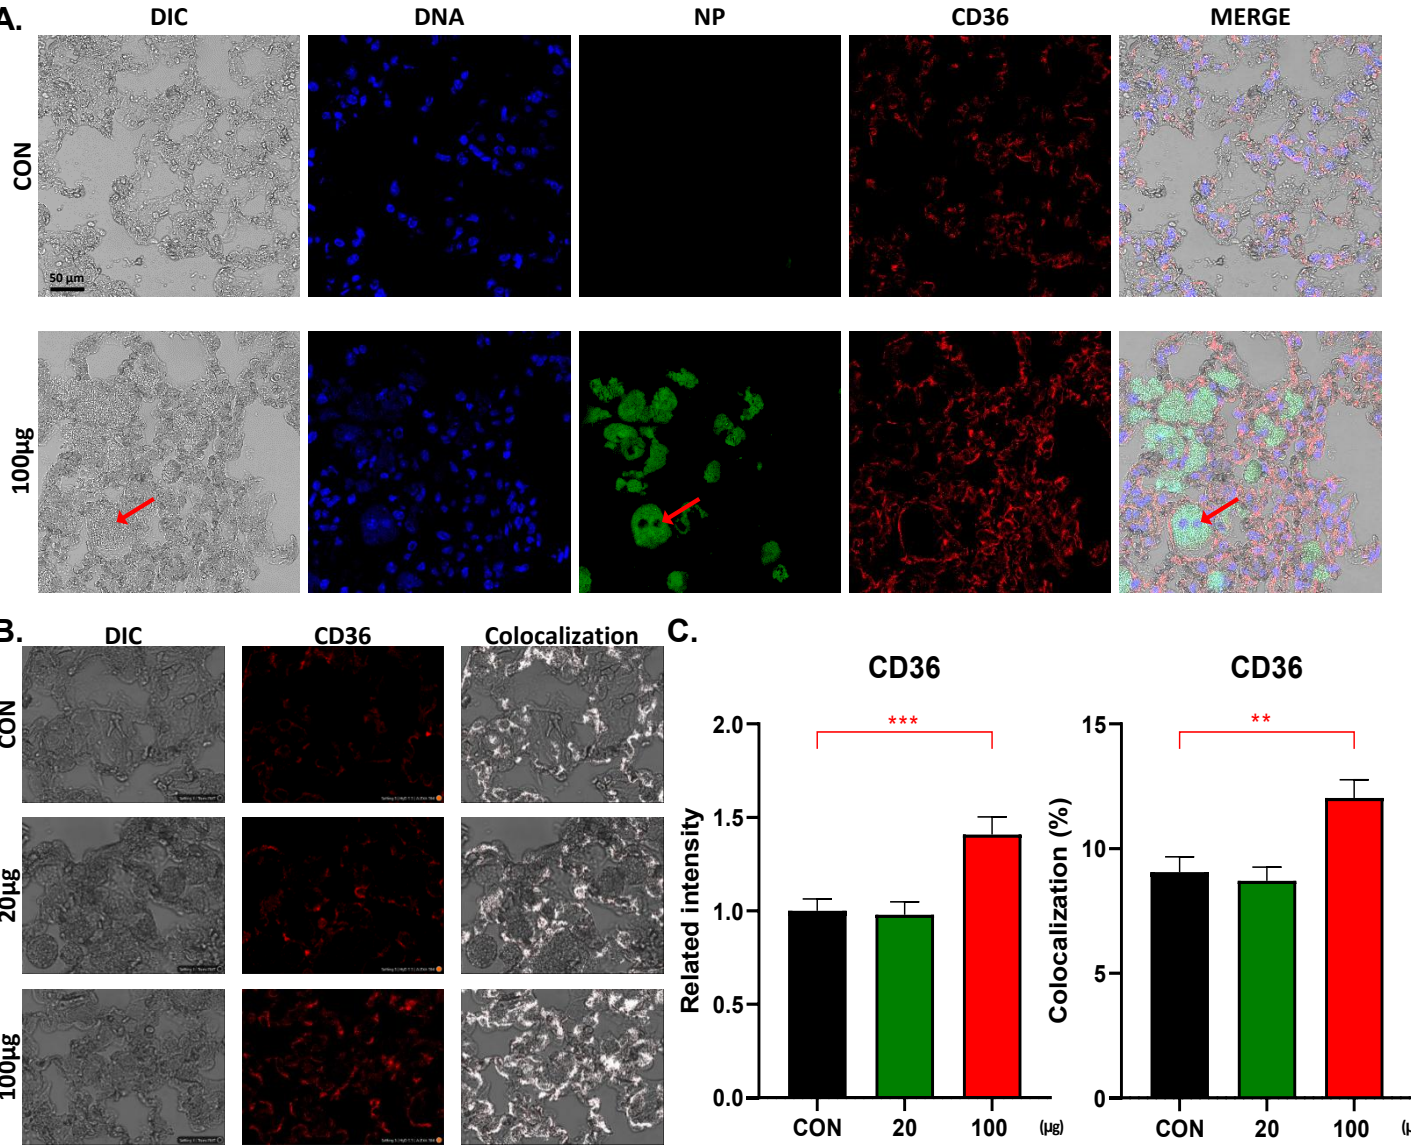

**Supplement 2.** (A) Immunofluorescence staining was performed to assess CD36 protein expression in lung tissue sections. (A, B and C) CD36, DNA and NPs were visualized using confocal microscopy, and the colocalization of CD36 and the intensity of CD36 expression in lung tissue are presented (n = 5, ordinary one-way ANOVA). Red arrow indicate macrophage. Data are presented as the mean ± SEM. \*\*p < 0.01, \*\*\*p < 0.001.
