# Supplementary material for: Pulmonary Toxicity of Polymethyl methacrylate nanoplastics via Intratracheal Intubation in Mice
Source: Research Square preprint supplement (doi:10.21203/rs.3.rs-7466865/v1), 2025-09-11
Supplement: Supplementary file 2 [file 76aa94862152fb4e61d225bc.pdf]

Supplement 1.

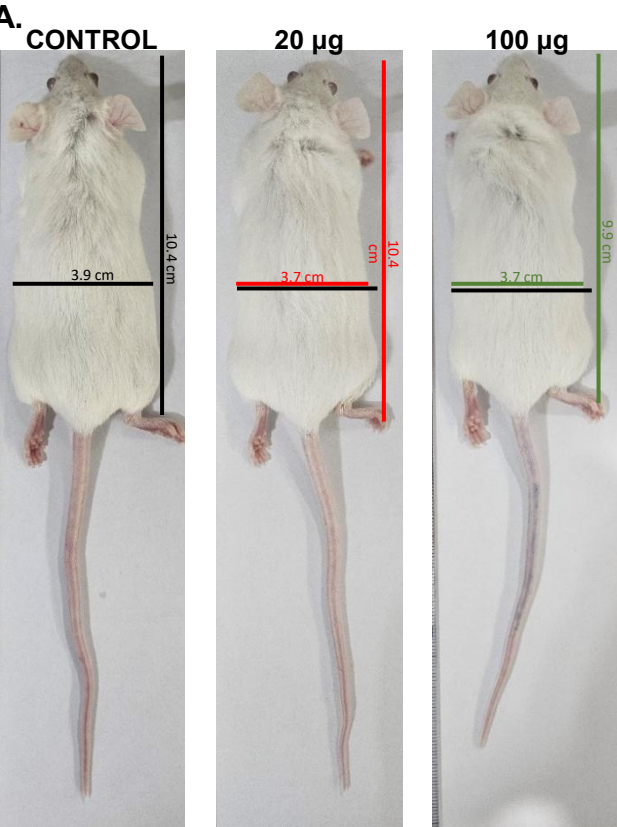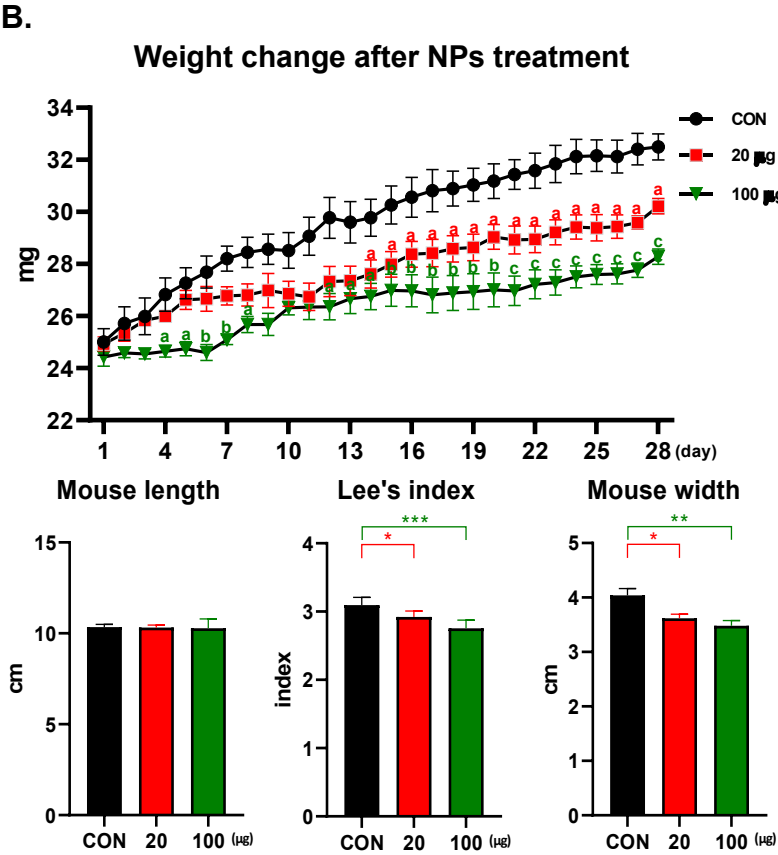

**Supplement 1.** (A,B) Body weight change was measured throughout the NP administration period. After the completion of administration, mouse length, Lee's index, and width were measured (n = 5, ordinary one-way ANOVA). Data are presented as the mean  $\pm$  SEM. \*p < 0.05, \*\*p < 0.01, \*\*\*p < 0.001.
